# Supplementary material
Source: Springer Nature journal article supplement (https://www.springermedizin.de/resource/supplementary/13063_2011_712_MOESM1_ESM.pdf/9618558)
Supplement: MOESM1 [file 9618558]

**Ethics approval**

**153 primary schools invited & asked to complete brief survey of current pupil numbers and school activities**

60 schools **recruited and randomised** n~1500 pupils

30 schools allocated to **intervention**  
n~ 750 children in year 4

30 schools allocated to **control**  
N~750 children in year 4

**Baseline measurements - children in Year 4:**  
accelerometer assessed sedentary behaviour and physical activity,  
diet, height, weight, waist circumference, screen-based activities.  
n ~ 1500

Active For Life Year 5 **intervention**  
**Process assessment** – teachers logs etc.

**Audit of all schools**  
Collecting information on e.g. changes to local policy or relevant healthy  
promotion initiatives in children

**Immediate follow-up measurements- children in Year 5:**  
accelerometer assessed sedentary behaviour and physical activity, diet,  
height, weight, waist circumference, screen-based activities. n=1425 (95%)  
Qualitative data collection with children, teachers & parents.

**12-month long-term follow-up measurements - children in Year 6:**  
accelerometer assessed sedentary behaviour and physical activity, diet,  
height, weight, waist circumference, screen-based activities. n=1350 (90%)  
Qualitative data collection with children, teachers & parents.

Active For Life Year 5 **intervention**  
provided to **control** schools
